# Supplementary material
Source: publisher site journal article supplement (https://www.kjim.org/upload/media/kjim-2025-052-Supplementary-Fig-1.pdf)
Supplement: Supplementary file 1 [file kjim-2025-052-Supplementary-Fig-1.pdf]

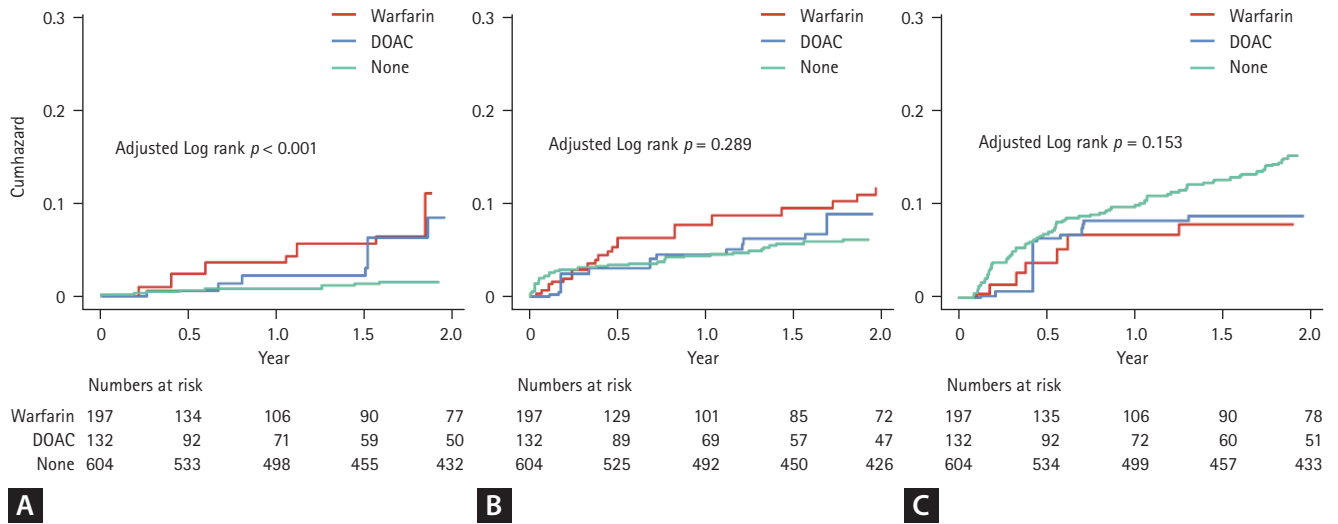

**Supplementary Figure 1.** Weighted cumulative incidence curves of secondary outcomes according to treatment group. (A) Intracranial hemorrhage. (B) Gastrointestinal bleeding. (C) All cause death. DOAC, direct oral anticoagulant.
